# Supplementary material for: Metacommunity Composition of Web-Spiders in a Fragmented Neotropical Forest: Relative Importance of Environmental and Spatial Effects
Source: PubMed Central journal article supplement (PMC3479130; doi:10.1371/journal.pone.0048099), 2012-10-23
Supplement: pone.0048099.s001.pdf [file pone.0048099.s001.pdf]

| Species                         | Family            | P1 | P2 | P3 | P4 | P5 | P6 | P7 | P8 | P9 | P10 | P11 | P12 | P13 | P14 | P15 | P16 | Total |
|---------------------------------|-------------------|----|----|----|----|----|----|----|----|----|-----|-----|-----|-----|-----|-----|-----|-------|
| <i>Achaearanea passiva</i>      | Theridiidae       | 0  | 1  | 6  | 1  | 1  | 3  | 0  | 1  | 2  | 1   | 0   | 5   | 1   | 4   | 0   | 1   | 27    |
| <i>Chrysometa itaimba</i>       | Tetragnathidae    | 2  | 1  | 2  | 2  | 1  | 0  | 0  | 6  | 3  | 2   | 3   | 0   | 2   | 1   | 0   | 1   | 26    |
| <i>Philoponella fasciata</i>    | Uloboridae        | 1  | 1  | 1  | 0  | 7  | 1  | 0  | 0  | 0  | 0   | 0   | 0   | 2   | 0   | 6   | 0   | 19    |
| <i>Tidarrem haemorrhoidale</i>  | Theridiidae       | 1  | 0  | 0  | 0  | 1  | 1  | 3  | 1  | 0  | 1   | 0   | 0   | 3   | 1   | 0   | 6   | 18    |
| <i>Sphecozone personata</i>     | Linyphiidae       | 0  | 0  | 1  | 2  | 0  | 1  | 0  | 0  | 1  | 0   | 0   | 10  | 1   | 0   | 1   | 0   | 17    |
| <i>Theridion quadripartitum</i> | Theridiidae       | 0  | 0  | 1  | 0  | 1  | 0  | 0  | 9  | 0  | 0   | 0   | 0   | 1   | 0   | 0   | 4   | 16    |
| <i>Alpaida canoa</i>            | Araneidae         | 0  | 0  | 0  | 2  | 0  | 0  | 0  | 2  | 2  | 2   | 0   | 0   | 0   | 0   | 3   | 0   | 11    |
| <i>Faiditus striatus</i>        | Theridiidae       | 0  | 3  | 2  | 2  | 1  | 1  | 1  | 0  | 0  | 0   | 0   | 0   | 0   | 0   | 0   | 1   | 11    |
| <i>Alpaida alticeps</i>         | Araneidae         | 0  | 0  | 0  | 0  | 0  | 0  | 0  | 0  | 0  | 6   | 0   | 0   | 0   | 0   | 0   | 3   | 9     |
| <i>Theridion calcynatum</i>     | Theridiidae       | 0  | 0  | 1  | 0  | 0  | 1  | 5  | 0  | 0  | 0   | 0   | 0   | 0   | 0   | 0   | 2   | 9     |
| <i>Hahnia</i> sp.               | Hahniidae         | 1  | 0  | 1  | 2  | 1  | 0  | 0  | 1  | 0  | 0   | 2   | 0   | 0   | 0   | 0   | 0   | 8     |
| <i>Thymoites</i> sp.            | Theridiidae       | 0  | 0  | 0  | 0  | 0  | 0  | 0  | 0  | 0  | 0   | 1   | 3   | 1   | 1   | 1   | 0   | 7     |
| <i>Cyclosa fililineata</i>      | Araneidae         | 0  | 1  | 1  | 3  | 0  | 0  | 0  | 0  | 0  | 0   | 0   | 0   | 0   | 0   | 0   | 0   | 5     |
| <i>Leucauge</i> sp.3            | Tetragnathidae    | 1  | 0  | 2  | 0  | 1  | 1  | 0  | 0  | 0  | 0   | 0   | 0   | 0   | 0   | 0   | 0   | 5     |
| <i>Achaearanea tessellata</i>   | Theridiidae       | 0  | 0  | 0  | 0  | 0  | 0  | 1  | 0  | 0  | 0   | 0   | 1   | 0   | 1   | 0   | 0   | 3     |
| <i>Cyclosa morretes</i>         | Araneidae         | 0  | 0  | 0  | 0  | 1  | 1  | 1  | 0  | 0  | 0   | 0   | 0   | 0   | 0   | 0   | 0   | 3     |
| <i>Echinotheridion</i> sp.      | Theridiidae       | 0  | 0  | 0  | 0  | 0  | 0  | 0  | 0  | 1  | 0   | 0   | 0   | 0   | 2   | 0   | 0   | 3     |
| <i>Leucauge</i> sp.1            | Tetragnathidae    | 0  | 1  | 0  | 0  | 0  | 0  | 2  | 0  | 0  | 0   | 0   | 0   | 0   | 0   | 0   | 0   | 3     |
| <i>Neospintharus rioensis</i>   | Theridiidae       | 0  | 0  | 0  | 0  | 0  | 0  | 0  | 0  | 1  | 1   | 0   | 0   | 0   | 0   | 0   | 1   | 3     |
| <i>Phoroncidia reimoseri</i>    | Theridiidae       | 2  | 0  | 0  | 0  | 0  | 0  | 0  | 0  | 0  | 0   | 0   | 1   | 0   | 0   | 0   | 0   | 3     |
| <i>Theridion olaup</i>          | Theridiidae       | 0  | 0  | 0  | 0  | 0  | 0  | 0  | 0  | 0  | 0   | 0   | 0   | 0   | 0   | 0   | 3   | 3     |
| <i>Wagneriana iguape</i>        | Araneidae         | 0  | 0  | 0  | 3  | 0  | 0  | 0  | 0  | 0  | 0   | 0   | 0   | 0   | 0   | 0   | 0   | 3     |
| <i>Araneus unaninus</i>         | Araneidae         | 0  | 0  | 0  | 0  | 0  | 0  | 1  | 0  | 0  | 0   | 0   | 0   | 0   | 0   | 0   | 1   | 2     |
| <i>Ariamnes longissimus</i>     | Theridiidae       | 0  | 0  | 0  | 0  | 0  | 0  | 0  | 0  | 1  | 0   | 0   | 0   | 0   | 1   | 0   | 0   | 2     |
| <i>Dolichognatha</i> sp.        | Tetragnathidae    | 0  | 1  | 0  | 0  | 0  | 0  | 0  | 0  | 0  | 0   | 0   | 0   | 1   | 0   | 0   | 0   | 2     |
| <i>Exalbidion</i> sp.           | Theridiidae       | 0  | 0  | 0  | 0  | 0  | 0  | 0  | 0  | 0  | 0   | 0   | 1   | 0   | 1   | 0   | 0   | 2     |
| <i>Faiditus affinis</i>         | Theridiidae       | 1  | 0  | 0  | 0  | 0  | 0  | 0  | 0  | 0  | 0   | 0   | 0   | 1   | 0   | 0   | 0   | 2     |
| <i>Nephila clavipes</i>         | Nephilidae        | 0  | 1  | 1  | 0  | 0  | 0  | 0  | 0  | 0  | 0   | 0   | 0   | 0   | 0   | 0   | 0   | 2     |
| <i>Philoponella</i> sp.         | Uloboridae        | 0  | 0  | 0  | 0  | 0  | 0  | 0  | 0  | 0  | 1   | 0   | 0   | 0   | 0   | 1   | 0   | 2     |
| <i>Tekellina</i> sp.            | Theridiidae       | 0  | 0  | 0  | 0  | 0  | 0  | 0  | 0  | 0  | 0   | 0   | 0   | 1   | 1   | 0   | 0   | 2     |
| <i>Wamba crispulus</i>          | Theridiidae       | 0  | 0  | 0  | 1  | 0  | 0  | 0  | 0  | 0  | 0   | 0   | 0   | 0   | 1   | 0   | 0   | 2     |
| <i>Wendilgarda</i> sp.          | Theridiosomatidae | 0  | 0  | 0  | 0  | 0  | 0  | 0  | 1  | 0  | 0   | 0   | 0   | 1   | 0   | 0   | 0   | 2     |

|                                |                |           |           |           |           |           |           |           |           |           |           |          |           |           |           |           |           |            |
|--------------------------------|----------------|-----------|-----------|-----------|-----------|-----------|-----------|-----------|-----------|-----------|-----------|----------|-----------|-----------|-----------|-----------|-----------|------------|
| <i>Achaearanea rioensis</i>    | Theridiidae    | 0         | 0         | 0         | 0         | 0         | 1         | 0         | 0         | 0         | 0         | 0        | 0         | 0         | 0         | 0         | 0         | 1          |
| <i>Achaearanea taim</i>        | Theridiidae    | 0         | 0         | 0         | 0         | 0         | 0         | 0         | 0         | 1         | 0         | 0        | 0         | 0         | 0         | 0         | 0         | 1          |
| <i>Anodoration claviferum</i>  | Linyphiidae    | 0         | 0         | 0         | 0         | 0         | 0         | 0         | 0         | 0         | 0         | 0        | 1         | 0         | 0         | 0         | 1         |            |
| <i>Chryso</i> sp.              | Theridiidae    | 1         | 0         | 0         | 0         | 0         | 0         | 0         | 0         | 0         | 0         | 0        | 0         | 0         | 0         | 0         | 1         |            |
| <i>Cyclosa inca</i>            | Araneidae      | 0         | 0         | 0         | 0         | 0         | 0         | 0         | 0         | 1         | 0         | 0        | 0         | 0         | 0         | 0         | 1         |            |
| <i>Dipoena atlantica</i>       | Theridiidae    | 0         | 0         | 0         | 0         | 0         | 0         | 0         | 0         | 0         | 0         | 1        | 0         | 0         | 0         | 0         | 1         |            |
| <i>Dipoena santacatarinae</i>  | Theridiidae    | 0         | 0         | 0         | 1         | 0         | 0         | 0         | 0         | 0         | 0         | 0        | 0         | 0         | 0         | 0         | 1         |            |
| <i>Dipoena</i> sp.             | Theridiidae    | 0         | 1         | 0         | 0         | 0         | 0         | 0         | 0         | 0         | 0         | 0        | 0         | 0         | 0         | 0         | 1         |            |
| <i>Dipoena variabilis</i>      | Theridiidae    | 0         | 0         | 0         | 0         | 0         | 0         | 0         | 0         | 0         | 1         | 0        | 0         | 0         | 0         | 0         | 1         |            |
| <i>Eustala</i> sp.             | Araneidae      | 0         | 0         | 0         | 0         | 0         | 0         | 1         | 0         | 0         | 0         | 0        | 0         | 0         | 0         | 0         | 1         |            |
| <i>Faiditus sicki</i>          | Theridiidae    | 0         | 0         | 0         | 0         | 0         | 0         | 0         | 0         | 0         | 0         | 1        | 0         | 0         | 0         | 0         | 1         |            |
| <i>Larinia montecarlo</i>      | Araneidae      | 0         | 1         | 0         | 0         | 0         | 0         | 0         | 0         | 0         | 0         | 0        | 0         | 0         | 0         | 0         | 1         |            |
| <i>Leucauge</i> sp.2           | Tetragnathidae | 0         | 0         | 0         | 0         | 0         | 0         | 1         | 0         | 0         | 0         | 0        | 0         | 0         | 0         | 0         | 1         |            |
| <i>Miagrammopes</i> sp.        | Uloboridae     | 0         | 0         | 0         | 0         | 0         | 0         | 0         | 0         | 0         | 0         | 0        | 0         | 0         | 1         | 0         | 1         |            |
| Mysmenidae sp.                 | Mysmenidae     | 0         | 1         | 0         | 0         | 0         | 0         | 0         | 0         | 0         | 0         | 0        | 0         | 0         | 0         | 0         | 1         |            |
| <i>Ocrepeira gnomo</i>         | Araneidae      | 0         | 0         | 0         | 1         | 0         | 0         | 0         | 0         | 0         | 0         | 0        | 0         | 0         | 0         | 0         | 1         |            |
| <i>Rhomphaea brasiliensis</i>  | Theridiidae    | 0         | 0         | 0         | 0         | 0         | 0         | 0         | 0         | 0         | 1         | 0        | 0         | 0         | 0         | 0         | 1         |            |
| <i>Scoloderus cordatus</i>     | Araneidae      | 0         | 0         | 0         | 0         | 0         | 0         | 0         | 1         | 0         | 0         | 0        | 0         | 0         | 0         | 0         | 1         |            |
| <i>Sphecozone diversicolor</i> | Linyphiidae    | 0         | 0         | 0         | 0         | 0         | 1         | 0         | 0         | 0         | 0         | 0        | 0         | 0         | 0         | 0         | 1         |            |
| <i>Spintharus gracilis</i>     | Theridiidae    | 0         | 0         | 0         | 0         | 0         | 0         | 0         | 0         | 0         | 0         | 0        | 1         | 0         | 0         | 0         | 1         |            |
| <i>Theridion teresae</i>       | Theridiidae    | 0         | 0         | 1         | 0         | 0         | 0         | 0         | 0         | 0         | 0         | 0        | 0         | 0         | 0         | 0         | 1         |            |
| <i>Thwaitesia affinis</i>      | Theridiidae    | 0         | 0         | 0         | 0         | 0         | 0         | 0         | 0         | 1         | 0         | 0        | 0         | 0         | 0         | 0         | 1         |            |
| <i>Wirada sigillata</i>        | Theridiidae    | 0         | 0         | 0         | 0         | 0         | 0         | 0         | 0         | 0         | 0         | 1        | 0         | 0         | 0         | 0         | 1         |            |
| <b>Total abundance (N)</b>     |                | <b>10</b> | <b>13</b> | <b>20</b> | <b>20</b> | <b>15</b> | <b>12</b> | <b>16</b> | <b>22</b> | <b>14</b> | <b>16</b> | <b>7</b> | <b>23</b> | <b>17</b> | <b>14</b> | <b>13</b> | <b>23</b> | <b>255</b> |
| <b>Total richness (S)</b>      |                | <b>8</b>  | <b>11</b> | <b>12</b> | <b>11</b> | <b>9</b>  | <b>10</b> | <b>9</b>  | <b>8</b>  | <b>10</b> | <b>9</b>  | <b>4</b> | <b>8</b>  | <b>13</b> | <b>10</b> | <b>6</b>  | <b>10</b> |            |
